# Supplementary material for: Study protocol for a Critical Realist pilot cluster-randomised controlled trial of a whole-school-based mindfulness intervention (SBMI) promoting child and adolescent mental wellbeing in Rwanda and Ethiopia
Source: bioRxiv or medRxiv preprint supplement (doi:10.1101/2023.05.10.23289769), 2023-05-11
Supplement: Supplementary file [file media-1.pdf]

Additional Material 1

Sources of Evidence and Examples of Research Questions in Phase 2

| Research Questions                                    | Participants         | Survey Questionnaire | Psychometric tools                                                                                                                                                          | Qualitative interviews and FGDs                                                                                                                                                                                                                                                                                                                               | Routine Administrative Data | Observation by researchers                                                                                                                                                                                                     | Cost Analysis |
|-------------------------------------------------------|----------------------|----------------------|-----------------------------------------------------------------------------------------------------------------------------------------------------------------------------|---------------------------------------------------------------------------------------------------------------------------------------------------------------------------------------------------------------------------------------------------------------------------------------------------------------------------------------------------------------|-----------------------------|--------------------------------------------------------------------------------------------------------------------------------------------------------------------------------------------------------------------------------|---------------|
| <b>What is the school and community climate like?</b> | Baseline (yr. 2/yr3) |                      |                                                                                                                                                                             |                                                                                                                                                                                                                                                                                                                                                               |                             |                                                                                                                                                                                                                                |               |
|                                                       | CAs                  |                      | School climate<br>Life satisfaction<br>Mental wellbeing<br>Mindfulness<br>Emotional regulation<br>Resilience<br>School engagement<br>Pupil behaviour<br>School satisfaction | Please tell me about what your school is like.<br>How do you get on with your classmates?<br>How do you get on with your teacher?<br>What do you like and what do you dislike about your school?<br>How do CAs behave in the classroom?<br>How do teachers maintain discipline in the classroom?<br>Tell me about how your friends influence how your behave? |                             | How children behaviour in class and on the playground<br>How teachers interact with CAs in school<br>How teachers interact with children in the classroom.<br>How children behave in class<br>How teachers maintain discipline |               |
|                                                       | Teachers             |                      | Mental wellbeing                                                                                                                                                            | Please tell me what it is like to be a                                                                                                                                                                                                                                                                                                                        |                             |                                                                                                                                                                                                                                |               |

| Research Questions | Participants | Survey Questionnaire | Psychometric tools                                                         | Qualitative interviews and FGDs                                                                                                                                                                                                                                                                                                                                                                                                   | Routine Administrative Data | Observation by researchers | Cost Analysis |
|--------------------|--------------|----------------------|----------------------------------------------------------------------------|-----------------------------------------------------------------------------------------------------------------------------------------------------------------------------------------------------------------------------------------------------------------------------------------------------------------------------------------------------------------------------------------------------------------------------------|-----------------------------|----------------------------|---------------|
|                    |              |                      | Job satisfaction<br>Life satisfaction<br>School climate<br>Pupil behaviour | teacher at this school.<br>Tell me about how CAs behave in class.<br>What sort of CAs have behavioural/attention problems?<br>What sort of CAs need psychological support?<br>Tell me about CAs attitude to school<br>How has the school organisation influenced how you have taught?<br>Why has it had that Influence.<br>How does the school organisation influence the behaviour of pupils?<br>Why does it have the influence? |                             |                            |               |

| Research Questions | Participants               | Survey Questionnaire                                                                                                                                                                                | Psychometric tools                                                     | Qualitative interviews and FGDs                                                                                                                                                       | Routine Administrative Data                                            | Observation by researchers | Cost Analysis |
|--------------------|----------------------------|-----------------------------------------------------------------------------------------------------------------------------------------------------------------------------------------------------|------------------------------------------------------------------------|---------------------------------------------------------------------------------------------------------------------------------------------------------------------------------------|------------------------------------------------------------------------|----------------------------|---------------|
|                    |                            |                                                                                                                                                                                                     |                                                                        | How do you maintain discipline in your classroom?<br>Why do you use these methods to maintain discipline?                                                                             |                                                                        |                            |               |
|                    | School Administration      |                                                                                                                                                                                                     | School climate<br>Pupil behaviour                                      |                                                                                                                                                                                       | CA attendance and dropout rates, examination results. Teacher absence. |                            |               |
|                    | Mothers/primary caregivers | Lived Poverty Scale (AfroBarometer)<br>Wealth Index (DHS)<br>Child relationship with parents, siblings, peer group, attitude to school, relationship with teachers, relationship with other pupils. | Mental wellbeing<br>Satisfaction with Family life<br>Life satisfaction | Please tell me about the primary school your child/children attend.<br><br>Tell me about how the teachers treat the children.<br><br>Tell me about your children's attitude to school |                                                                        |                            |               |

| Research Questions | Participants                      | Survey Questionnaire                                                                                       | Psychometric tools                                                                             | Qualitative interviews and FGDs                                                                                                                                                                                                                     | Routine Administrative Data | Observation by researchers                                                          | Cost Analysis |
|--------------------|-----------------------------------|------------------------------------------------------------------------------------------------------------|------------------------------------------------------------------------------------------------|-----------------------------------------------------------------------------------------------------------------------------------------------------------------------------------------------------------------------------------------------------|-----------------------------|-------------------------------------------------------------------------------------|---------------|
|                    |                                   | Relationships with members of the community.<br>Behaviour at home<br>How parents discipline their children |                                                                                                | Tell me about your children's attitudes to their teachers<br><br>Tell me about the relationship between the school and parents.<br><br>Tell me about how your child behaves at home?<br>Please tell me about how you discipline your child at home? |                             |                                                                                     |               |
|                    |                                   |                                                                                                            |                                                                                                |                                                                                                                                                                                                                                                     |                             |                                                                                     |               |
|                    | <b>Process evaluation (yr. 3)</b> |                                                                                                            |                                                                                                |                                                                                                                                                                                                                                                     |                             |                                                                                     |               |
|                    | CA                                |                                                                                                            | School climate<br>Life satisfaction<br>Mental wellbeing<br>Mindfulness<br>Emotional regulation | Please tell me about what has happened at school since the start of the school year.<br>Why do you think that these changes have taken place?                                                                                                       |                             | How children behaviour in class and on the playground<br>How teachers interact with |               |

| Research Questions | Participants | Survey Questionnaire | Psychometric tools                                                        | Qualitative interviews and FGDs                                                                                                                                                                                                                                                                                                                                                                                                                                                | Routine Administrative Data | Observation by researchers                                                                                                                                                                | Cost Analysis |
|--------------------|--------------|----------------------|---------------------------------------------------------------------------|--------------------------------------------------------------------------------------------------------------------------------------------------------------------------------------------------------------------------------------------------------------------------------------------------------------------------------------------------------------------------------------------------------------------------------------------------------------------------------|-----------------------------|-------------------------------------------------------------------------------------------------------------------------------------------------------------------------------------------|---------------|
|                    |              |                      | Resilience<br>School engagement<br>Pupil behaviour<br>School satisfaction | Please tell me about any changes in children's behaviour at your school since the beginning of the school year.<br>How has their behaviour changed?<br>How has your behaviour changed?<br>Why do you think that there have been these changes<br>Tell me about any changes in how teachers treat the children in your school<br>Tell me about any changes in the way teachers manage discipline in the classroom<br>Tell me why you think that these changes have taken place. |                             | CAs in school<br>How teachers interact with children in the classroom.<br>How children behave in class<br>How teachers maintain discipline<br><br>How CAs respond to mindfulness training |               |

| Research Questions | Participants | Survey Questionnaire | Psychometric tools                                                                             | Qualitative interviews and FGDs                                                                                                                                                                                                                                                                                                                                         | Routine Administrative Data | Observation by researchers | Cost Analysis |
|--------------------|--------------|----------------------|------------------------------------------------------------------------------------------------|-------------------------------------------------------------------------------------------------------------------------------------------------------------------------------------------------------------------------------------------------------------------------------------------------------------------------------------------------------------------------|-----------------------------|----------------------------|---------------|
|                    |              |                      |                                                                                                | <p>Tell me about the mindfulness exercises you have been taught.</p> <p>Tell me about practising the mindfulness exercises</p> <p>Tell me about things that have made it difficult for you to do the mindfulness exercises.</p> <p>Can you think of anything else other than the mindfulness exercises that could have brought about the changes you have observed?</p> |                             |                            |               |
|                    | Teachers     |                      | <p>Mental wellbeing</p> <p>Job satisfaction</p> <p>Life satisfaction</p> <p>School climate</p> | <p>Please tell me about any changes in the behaviour of pupils in your class since the start of the school year</p>                                                                                                                                                                                                                                                     |                             |                            |               |

| Research Questions | Participants | Survey Questionnaire | Psychometric tools | Qualitative interviews and FGDs                                                                                                                                                                                                                                                                                                                                                                                                                                                  | Routine Administrative Data | Observation by researchers | Cost Analysis |
|--------------------|--------------|----------------------|--------------------|----------------------------------------------------------------------------------------------------------------------------------------------------------------------------------------------------------------------------------------------------------------------------------------------------------------------------------------------------------------------------------------------------------------------------------------------------------------------------------|-----------------------------|----------------------------|---------------|
|                    |              |                      | Pupil behaviour    | <p>How have they changed</p> <p>Why do you think that these changes have taken place?</p> <p>How has your behaviour changed since the beginning of the school year?</p> <p>Why do you think that these changes have taken place?</p> <p>When you reflect on the mindfulness intervention, what motivated you to implement it?</p> <p>How has the mindfulness intervention changed the pupils in your class?</p> <p>Why do you think that it has brought about these changes?</p> |                             |                            |               |

| Research Questions | Participants               | Survey Questionnaire | Psychometric tools                                                                                           | Qualitative interviews and FGDs                                                                                                               | Routine Administrative Data                                            | Observation by researchers                                                          | Cost Analysis |
|--------------------|----------------------------|----------------------|--------------------------------------------------------------------------------------------------------------|-----------------------------------------------------------------------------------------------------------------------------------------------|------------------------------------------------------------------------|-------------------------------------------------------------------------------------|---------------|
|                    |                            |                      |                                                                                                              | Can you think of anything else, other than the mindfulness exercises that could have brought about these changes?                             |                                                                        |                                                                                     |               |
|                    | School Administration      |                      | School climate<br>Pupil behaviour                                                                            |                                                                                                                                               | CA attendance and dropout rates, examination results. Teacher absence. |                                                                                     |               |
|                    | Mothers/primary caregivers |                      |                                                                                                              |                                                                                                                                               |                                                                        |                                                                                     |               |
|                    |                            |                      |                                                                                                              |                                                                                                                                               |                                                                        |                                                                                     |               |
|                    | <b>End-of-line (yr. 3)</b> |                      |                                                                                                              |                                                                                                                                               |                                                                        |                                                                                     |               |
|                    | CAs                        |                      | School climate<br>Life satisfaction<br>Mental wellbeing<br>Mindfulness<br>Emotional regulation<br>Resilience | Please tell me about what has happened at school since the start of the school year.<br>Why do you think that these changes have taken place? |                                                                        | How children behaviour in class and on the playground<br>How teachers interact with |               |



| Research Questions | Participants | Survey Questionnaire | Psychometric tools                                                         | Qualitative interviews and FGDs                                                                                                                                                                                                                                                                                                                                                                                                                                                            | Routine Administrative Data | Observation by researchers                                                                                                                                                                                                                                       | Cost Analysis |
|--------------------|--------------|----------------------|----------------------------------------------------------------------------|--------------------------------------------------------------------------------------------------------------------------------------------------------------------------------------------------------------------------------------------------------------------------------------------------------------------------------------------------------------------------------------------------------------------------------------------------------------------------------------------|-----------------------------|------------------------------------------------------------------------------------------------------------------------------------------------------------------------------------------------------------------------------------------------------------------|---------------|
|                    |              |                      | <p>School engagement</p> <p>Pupil behaviour</p> <p>School satisfaction</p> | <p>Please tell me about any changes in children's behaviour at your school since the beginning of the school year.</p> <p>How has their behaviour changed?</p> <p>How has your behaviour changed?</p> <p>Why do you think that there have been these changes</p> <p>Tell me about any changes in how teachers treat the children in your school</p> <p>Tell me why you think that these changes have taken place.</p> <p>Tell me about the mindfulness exercises you have been taught.</p> |                             | <p>CAs in school</p> <p>How teachers interact with children in the classroom.</p> <p>How children behave in class</p> <p>How teachers maintain discipline</p> <p>How teachers teach the mindfulness exercises</p> <p>How CAs respond to mindfulness training</p> |               |

| Research Questions | Participants | Survey Questionnaire | Psychometric tools                                                                             | Qualitative interviews and FGDs                                                                                                                                                                                                                                                                                                                                                                                            | Routine Administrative Data | Observation by researchers | Cost Analysis |
|--------------------|--------------|----------------------|------------------------------------------------------------------------------------------------|----------------------------------------------------------------------------------------------------------------------------------------------------------------------------------------------------------------------------------------------------------------------------------------------------------------------------------------------------------------------------------------------------------------------------|-----------------------------|----------------------------|---------------|
|                    |              |                      |                                                                                                | Tell me about practising the mindfulness exercises                                                                                                                                                                                                                                                                                                                                                                         |                             |                            |               |
|                    | Teachers     |                      | Mental wellbeing<br>Job satisfaction<br>Life satisfaction<br>School climate<br>Pupil behaviour | Please tell me about any changes in the behaviour of pupils in your class since the start of the school year<br>How have they changed<br>Why do you think that these changes have taken place?<br>How has your behaviour changed since the beginning of the school year?<br>Why do you think that these changes have taken place?<br>When you reflect on the mindfulness intervention, what motivated you to implement it? |                             |                            |               |

| Research Questions | Participants                | Survey Questionnaire                                                                                                                              | Psychometric tools                                                     | Qualitative interviews and FGDs                                                                                                      | Routine Administrative Data                                            | Observation by researchers | Cost Analysis |
|--------------------|-----------------------------|---------------------------------------------------------------------------------------------------------------------------------------------------|------------------------------------------------------------------------|--------------------------------------------------------------------------------------------------------------------------------------|------------------------------------------------------------------------|----------------------------|---------------|
|                    |                             |                                                                                                                                                   |                                                                        | How has the mindfulness intervention changed the pupils in your class?<br>Why do you think that it has brought about these changes?  |                                                                        |                            |               |
|                    | School Administration       |                                                                                                                                                   | School climate<br>Pupil behaviour                                      |                                                                                                                                      | CA attendance and dropout rates, examination results. Teacher absence. |                            |               |
|                    | Mothers/primary carergivers | Lived Poverty Scale (AfroBarometer)<br>Wealth Index (DHS)<br>Child anxious, depressed, has difficulty in sleeping, aggressive, relationships with | Mental wellbeing<br>Satisfaction with Family life<br>Life satisfaction | What changes have you noticed in your child/children over the last school year<br>Why do you think that these changes have occurred? |                                                                        |                            |               |

| Research Questions                      | Participants            | Survey Questionnaire                                                                                                                                                                                                                                                                                                                    | Psychometric tools              | Qualitative interviews and FGDs | Routine Administrative Data      | Observation by researchers | Cost Analysis |
|-----------------------------------------|-------------------------|-----------------------------------------------------------------------------------------------------------------------------------------------------------------------------------------------------------------------------------------------------------------------------------------------------------------------------------------|---------------------------------|---------------------------------|----------------------------------|----------------------------|---------------|
|                                         |                         | <p>parents, siblings, peer groups, attitude to school, relationship with teachers and with other pupils<br/>           Parents' attitude to school.<br/>           Compared with the beginning of the school year, would you say that your child's behaviour at home is a lot better, better, much the same, worse, or a lot worse?</p> |                                 |                                 |                                  |                            |               |
|                                         |                         |                                                                                                                                                                                                                                                                                                                                         |                                 |                                 |                                  |                            |               |
| <b>What is the status of the mental</b> | <b>Baseline (yr. 2)</b> |                                                                                                                                                                                                                                                                                                                                         |                                 |                                 |                                  |                            |               |
|                                         | CAs                     |                                                                                                                                                                                                                                                                                                                                         | Mental wellbeing<br>Mindfulness |                                 | How do you feel about school and |                            |               |

| Research Questions | Participants               | Survey Questionnaire                        | Psychometric tools                 | Qualitative interviews and FGDs | Routine Administrative Data                                                                                                                                                                                             | Observation by researchers | Cost Analysis |
|--------------------|----------------------------|---------------------------------------------|------------------------------------|---------------------------------|-------------------------------------------------------------------------------------------------------------------------------------------------------------------------------------------------------------------------|----------------------------|---------------|
| wellbeing of CAs?  |                            |                                             | Emotional regulation<br>Resilience |                                 | your life in general?<br>Why do you think that you feel like that?                                                                                                                                                      |                            |               |
|                    | Teachers                   |                                             |                                    |                                 | What do you think are the main health problems CAs at your Schools have?<br>What is the mental wellbeing like of the CAs in your class?<br>Why do you think the mental wellbeing of children in your class is as it is? |                            |               |
|                    | School Administration      |                                             |                                    |                                 |                                                                                                                                                                                                                         |                            |               |
|                    | Mothers/primary caregivers | Child anxious, depressed, has difficulty in |                                    |                                 | What do you think are the main health                                                                                                                                                                                   |                            |               |

| Research Questions | Participants  | Survey Questionnaire  | Psychometric tools | Qualitative interviews and FGDs                                                                                                                                                                                                         | Routine Administrative Data                                                                                                                                                                                           | Observation by researchers | Cost Analysis |
|--------------------|---------------|-----------------------|--------------------|-----------------------------------------------------------------------------------------------------------------------------------------------------------------------------------------------------------------------------------------|-----------------------------------------------------------------------------------------------------------------------------------------------------------------------------------------------------------------------|----------------------------|---------------|
|                    |               | sleeping, aggressive. |                    |                                                                                                                                                                                                                                         | <p>problems that CAs have in this community?<br/>           What do you think about the mental wellbeing of CAs?<br/>           Why do you think this?<br/>           Why do some CAs have poor mental wellbeing?</p> |                            |               |
|                    | Policy actors |                       |                    | <p>What are the main health problems for CAs in Rwanda?<br/>           Why are these a problem?<br/>           How much of a problem is mental wellbeing?<br/>           Why do you think that some CAs have poor mental wellbeing?</p> |                                                                                                                                                                                                                       |                            |               |



| Research Questions | Participants        | Survey Questionnaire | Psychometric tools                                                    | Qualitative interviews and FGDs | Routine Administrative Data                                                                                                                                                                                                                                                                                             | Observation by researchers | Cost Analysis |
|--------------------|---------------------|----------------------|-----------------------------------------------------------------------|---------------------------------|-------------------------------------------------------------------------------------------------------------------------------------------------------------------------------------------------------------------------------------------------------------------------------------------------------------------------|----------------------------|---------------|
|                    | End-of-line (yr. 3) |                      |                                                                       |                                 |                                                                                                                                                                                                                                                                                                                         |                            |               |
|                    | CAs                 |                      | Mental wellbeing<br>Mindfulness<br>Emotional regulation<br>Resilience |                                 | Have you noticed any changes in how your fellow pupils feel about school and their life in general since the beginning of the school year?<br><br>Have you noticed any changes in how you feel about school and your life since the beginning of the school year?<br>Why do you think that these changes have happened? |                            |               |



| Research Questions                                                                                            | Participants               | Survey Questionnaire                                                                                                                      | Psychometric tools | Qualitative interviews and FGDs | Routine Administrative Data | Observation by researchers | Cost Analysis |
|---------------------------------------------------------------------------------------------------------------|----------------------------|-------------------------------------------------------------------------------------------------------------------------------------------|--------------------|---------------------------------|-----------------------------|----------------------------|---------------|
|                                                                                                               | Teachers                   |                                                                                                                                           |                    |                                 |                             |                            |               |
|                                                                                                               | School Administration      |                                                                                                                                           |                    |                                 |                             |                            |               |
|                                                                                                               | Mothers/primary caregivers | Child anxious, depressed, has difficulty in sleeping, aggressive.                                                                         |                    |                                 |                             |                            |               |
|                                                                                                               |                            |                                                                                                                                           |                    |                                 |                             |                            |               |
| <b>For whom, how and why were there these changes in CA's mental wellbeing after eight months of delivery</b> | <b>Baseline (yr. 2)</b>    |                                                                                                                                           |                    |                                 |                             |                            |               |
|                                                                                                               | CAs                        | Demographic data - age, gender, class at school, location (rural Rwanda, urban Ethiopia). Have you been practising mindfulness exercises? |                    |                                 |                             |                            |               |
|                                                                                                               | Teachers                   |                                                                                                                                           |                    |                                 |                             |                            |               |
|                                                                                                               | School Administration      |                                                                                                                                           |                    |                                 |                             |                            |               |
|                                                                                                               | Mothers/primary caregivers | Demographic data - age of CAs attending primary school,                                                                                   |                    |                                 |                             |                            |               |



| Research Questions                                                               | Participants                      | Survey Questionnaire | Psychometric tools | Qualitative interviews and FGDs | Routine Administrative Data                                                                        | Observation by researchers | Cost Analysis |
|----------------------------------------------------------------------------------|-----------------------------------|----------------------|--------------------|---------------------------------|----------------------------------------------------------------------------------------------------|----------------------------|---------------|
| <b>Is the intervention culturally acceptable, affordable, and cost-effective</b> | <b>Baseline (yr. 2)</b>           |                      |                    |                                 |                                                                                                    |                            |               |
|                                                                                  | CAs                               |                      |                    |                                 |                                                                                                    |                            |               |
|                                                                                  | Teachers                          |                      |                    |                                 | What is your attitude to teaching mindfulness to your class?<br>Why do you say that?               |                            |               |
|                                                                                  | School Administration             |                      |                    |                                 |                                                                                                    |                            |               |
|                                                                                  | Mothers/primary caregivers        |                      |                    |                                 |                                                                                                    |                            |               |
|                                                                                  | Policy actors                     |                      |                    |                                 | What is your attitude to CAs being taught mindfulness exercises in school?<br>Why do you say that? |                            |               |
|                                                                                  |                                   |                      |                    |                                 |                                                                                                    |                            |               |
|                                                                                  | <b>Process evaluation (yr. 3)</b> |                      |                    |                                 |                                                                                                    |                            |               |
| CAs                                                                              |                                   |                      |                    |                                 | What do you think of the                                                                           |                            |               |

| Research Questions | Participants               | Survey Questionnaire | Psychometric tools | Qualitative interviews and FGDs | Routine Administrative Data                                                                                                            | Observation by researchers | Cost Analysis |
|--------------------|----------------------------|----------------------|--------------------|---------------------------------|----------------------------------------------------------------------------------------------------------------------------------------|----------------------------|---------------|
|                    |                            |                      |                    |                                 | mindfulness exercises you have been taught at school?<br>Why do you feel this way about them?                                          |                            |               |
|                    | Teachers                   |                      |                    |                                 | What do you think about teaching mindfulness exercises?<br>Why do you feel this way about teaching them to the children in your class? |                            |               |
|                    | School Administration      |                      |                    |                                 |                                                                                                                                        |                            |               |
|                    | Mothers/primary caregivers |                      |                    |                                 |                                                                                                                                        |                            |               |
|                    |                            |                      |                    |                                 |                                                                                                                                        |                            |               |
|                    | <b>End-of-line (yr. 3</b>  |                      |                    |                                 |                                                                                                                                        |                            |               |

| Research Questions | Participants          | Survey Questionnaire                                      | Psychometric tools | Qualitative interviews and FGDs | Routine Administrative Data                                                                                                                                            | Observation by researchers | Cost Analysis |
|--------------------|-----------------------|-----------------------------------------------------------|--------------------|---------------------------------|------------------------------------------------------------------------------------------------------------------------------------------------------------------------|----------------------------|---------------|
|                    | CAs                   | Where have you been practising the mindfulness exercises? |                    |                                 | What do you think of the mindfulness exercises you have been taught at school?<br>Why do you feel this way about them?<br>How have you used the mindfulness exercises? |                            |               |
|                    | Teachers              |                                                           |                    |                                 | What do you think about teaching mindfulness exercises?<br>Why do you feel this way about teaching them to the children in your class?                                 |                            |               |
|                    | School Administration |                                                           |                    |                                 |                                                                                                                                                                        |                            |               |

| Research Questions | Participants               | Survey Questionnaire                                                                                                                                                                                                                                                                                | Psychometric tools | Qualitative interviews and FGDs | Routine Administrative Data                                                                                                                                                                                                            | Observation by researchers | Cost Analysis |
|--------------------|----------------------------|-----------------------------------------------------------------------------------------------------------------------------------------------------------------------------------------------------------------------------------------------------------------------------------------------------|--------------------|---------------------------------|----------------------------------------------------------------------------------------------------------------------------------------------------------------------------------------------------------------------------------------|----------------------------|---------------|
|                    | Mothers/primary caregivers | <p>Have your child/children told you about the mindfulness exercises they have been taught at school this year?</p> <p>Do your children practice mindfulness exercises at home?</p> <p>What is your attitude to your children being taught mindfulness?</p> <p>Why do you have these attitudes?</p> |                    |                                 | <p>What is your attitude to the exercises your children have been taught in school?</p> <p>Why do you have this attitude towards them?</p> <p>What do your children say about the mindfulness exercises they are taught at school?</p> |                            |               |
|                    | Policy actors              |                                                                                                                                                                                                                                                                                                     |                    |                                 | <p>What is your attitude to CAs being taught mindfulness</p>                                                                                                                                                                           |                            |               |

| Research Questions | Participants | Survey Questionnaire | Psychometric tools | Qualitative interviews and FGDs | Routine Administrative Data                                                                                                                                                        | Observation by researchers | Cost Analysis |
|--------------------|--------------|----------------------|--------------------|---------------------------------|------------------------------------------------------------------------------------------------------------------------------------------------------------------------------------|----------------------------|---------------|
|                    |              |                      |                    |                                 | <p>exercises in school?<br/> Why do you have this attitude?<br/> Can you think of any alternative explanations for the changes that have occurred in the intervention schools?</p> |                            |               |
